# Supplementary material for: A single-cell based mass cytometry study on heterogeneous interactions between upconversion nanoparticles and human immune cells
Source: Royal Society of Chemistry journal article supplement (doi:10.1039/d2en00821a), 2023-01-01
Supplement: d2en00821a1.pdf [file d2en00821a1.pdf]

## **A single-cell based mass cytometry study on heterogeneous interactions between upconversion nanoparticles and human immune cells**

Zayakhuu Gerelkhuu<sup>ab</sup>, Haribalan Perumalsamy<sup>ab</sup>, Mahnaz Maddahfar<sup>c</sup>, Dayong Jin<sup>cd</sup>, Jaewoo Song<sup>e</sup>, and Tae Hyun Yoon<sup>\*abf</sup>

<sup>a</sup>Department of Chemistry, College of Natural Sciences, Hanyang University, Seoul 04763, Republic of Korea.

<sup>b</sup>Institute of Next Generation Material Design, Rm#820, Fusion Technology Center, Hanyang University, Seoul 04763, Republic of Korea.

<sup>c</sup>Institute for Biomedical Materials and Devices (IBMD), School of Mathematics and Physical Sciences, Faculty of Science, University of Technology Sydney, Sydney, New South Wales 2007, Australia.

<sup>d</sup>UTS-SUSTech Joint Research Centre for Biomedical Materials and Devices, Department of Biomedical Engineering, Southern University of Science and Technology, Shenzhen, Guangdong 518055, P.R.China.

<sup>e</sup>Department of Laboratory Medicine, College of Medicine, Yonsei University, Seoul 03722, Republic of Korea.

<sup>f</sup>Center for Next Generation Cytometry, Rm#623, Natural Science Building, Hanyang University, Seoul 04763, Republic of Korea.

\* Corresponding author: Tae Hyun Yoon

E-mail address: [taeyoon@hanyang.ac.kr](mailto:taeyoon@hanyang.ac.kr)



Figure S2. Zeta potential analysis of UCNP@Polymer

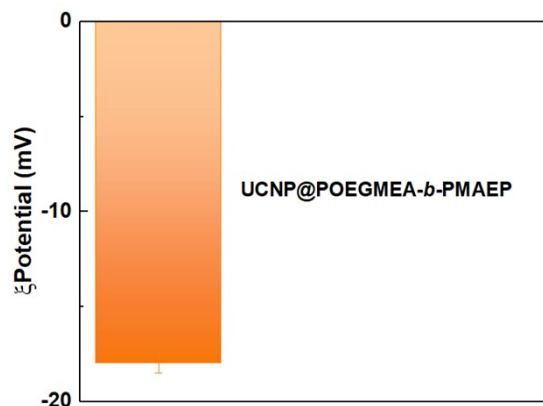

Table S1. Statistic of cell type identification in untreated, 0.5, 1, and 2 ppm of UCNP@Polymer. data was presented in mean and standard deviation.

|                                | Untreated |       | 0.5 ppm |       | 1 ppm |       | 2ppm  |       |
|--------------------------------|-----------|-------|---------|-------|-------|-------|-------|-------|
|                                | Value     | Error | Value   | Error | Value | Error | Value | Error |
| <b>mDCs</b>                    | 25.67     | 1.28  | 24.84   | 1.24  | 45.06 | 2.25  | 39.50 | 1.97  |
| <b>Classical monocytes</b>     | 23.84     | 1.19  | 22.01   | 1.10  | 12.83 | 0.64  | 12.25 | 0.61  |
| <b>Naive B cells</b>           | 5.76      | 0.29  | 4.93    | 0.25  | 2.93  | 0.15  | 3.13  | 0.16  |
| <b>Memory killer T cells</b>   | 4.10      | 0.21  | 4.47    | 0.22  | 3.29  | 0.16  | 3.37  | 0.17  |
| <b>Naive killer T cells</b>    | 3.91      | 0.20  | 3.43    | 0.17  | 2.81  | 0.14  | 3.14  | 0.16  |
| <b>Memory B cells</b>          | 3.21      | 0.16  | 3.13    | 0.16  | 3.23  | 0.16  | 3.62  | 0.18  |
| <b>Naive helper T cells</b>    | 3.01      | 0.15  | 1.40    | 0.07  | 0.73  | 0.04  | 1.09  | 0.05  |
| <b>Memory helper T cells</b>   | 2.80      | 0.14  | 2.67    | 0.13  | 1.66  | 0.08  | 1.87  | 0.09  |
| <b>Non-classical monocytes</b> | 1.14      | 0.06  | 1.53    | 0.08  | 1.98  | 0.10  | 2.13  | 0.11  |
| <b>Intermediate monocytes</b>  | 0.38      | 0.02  | 0.22    | 0.01  | 0.21  | 0.01  | 0.16  | 0.01  |
| <b>Neutrophils</b>             | 0.28      | 0.01  | 0.18    | 0.01  | 0.11  | 0.01  | 0.11  | 0.01  |
| <b>pDCs</b>                    | 0.27      | 0.01  | 0.43    | 0.02  | 0.47  | 0.02  | 0.48  | 0.02  |

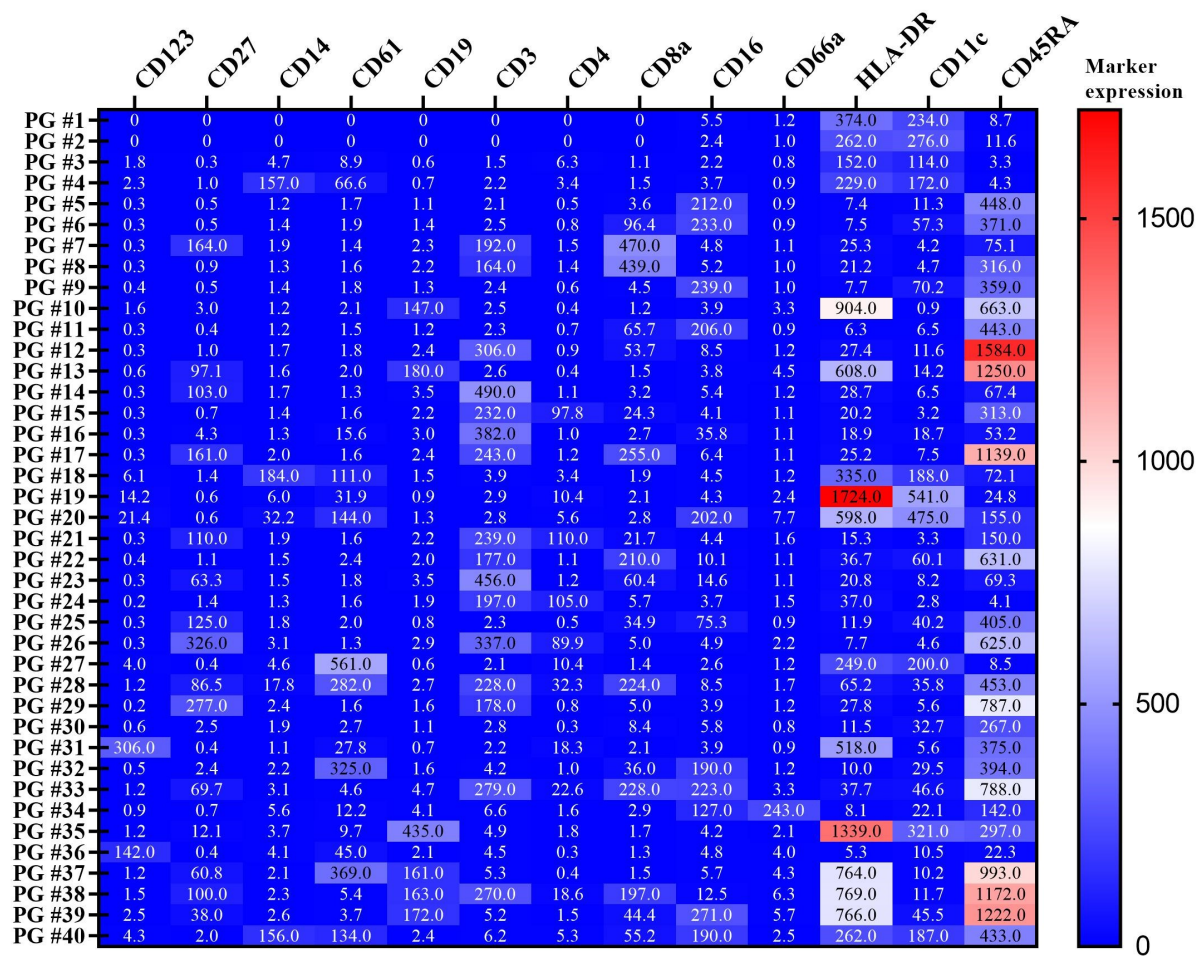

Figure S3. Heatmap showing marker expression in PhenoGraph clusters of total live cells.

Table S2. Population abundance of Phenograph clustering. Summarized statistic data was presented in mean and standard deviation.

|       | Untreated |        | 0.5 ppm |        | 1 ppm  |        | 2ppm   |        |
|-------|-----------|--------|---------|--------|--------|--------|--------|--------|
|       | Value     | Error  | Value   | Error  | Value  | Error  | Value  | Error  |
| PG#1  | 17.116    | 0.8558 | 11.122  | 0.5561 | 6.9    | 0.345  | 6.63   | 0.3315 |
| PG#2  | 0.05      | 0.0025 | 0.122   | 0.0061 | 14.26  | 0.713  | 13.026 | 0.6513 |
| PG#3  | 0.15      | 0.0075 | 0.48    | 0.024  | 13.544 | 0.6772 | 12.16  | 0.608  |
| PG#4  | 4.994     | 0.2497 | 9.61    | 0.4805 | 4.71   | 0.2355 | 3.734  | 0.1867 |
| PG#5  | 6.41      | 0.3205 | 8.132   | 0.4066 | 3.686  | 0.1843 | 4.08   | 0.204  |
| PG#6  | 6.164     | 0.3082 | 5.484   | 0.2742 | 4.934  | 0.2467 | 5.094  | 0.2547 |
| PG#7  | 5.058     | 0.2529 | 5.41    | 0.2705 | 4.316  | 0.2158 | 4.544  | 0.2272 |
| PG#8  | 3.98      | 0.199  | 5.08    | 0.254  | 4.268  | 0.2134 | 4.676  | 0.2338 |
| PG#9  | 4.77      | 0.2385 | 4.614   | 0.2307 | 3.458  | 0.1729 | 3.504  | 0.1752 |
| PG#10 | 5.378     | 0.2689 | 4.418   | 0.2209 | 2.518  | 0.1259 | 2.648  | 0.1324 |
| PG#11 | 4.524     | 0.2262 | 4.972   | 0.2486 | 2.588  | 0.1294 | 2.76   | 0.138  |
| PG#12 | 4.174     | 0.2087 | 4.478   | 0.2239 | 2.72   | 0.136  | 3.014  | 0.1507 |
| PG#13 | 3.554     | 0.1777 | 3.374   | 0.1687 | 3.532  | 0.1766 | 3.818  | 0.1909 |
| PG#14 | 3.702     | 0.1851 | 4.142   | 0.2071 | 3.014  | 0.1507 | 2.974  | 0.1487 |
| PG#15 | 4.024     | 0.2012 | 3.826   | 0.1913 | 2.796  | 0.1398 | 2.952  | 0.1476 |
| PG#16 | 3.626     | 0.1813 | 4.08    | 0.204  | 2.654  | 0.1327 | 2.628  | 0.1314 |
| PG#17 | 3.588     | 0.1794 | 3.342   | 0.1671 | 2.304  | 0.1152 | 2.66   | 0.133  |
| PG#18 | 2.82      | 0.141  | 2.804   | 0.1402 | 2.048  | 0.1024 | 2.282  | 0.1141 |
| PG#19 | 1.446     | 0.0723 | 1.792   | 0.0896 | 3.09   | 0.1545 | 3.23   | 0.1615 |
| PG#20 | 1.846     | 0.0923 | 2.17    | 0.1085 | 2.302  | 0.1151 | 2.432  | 0.1216 |
| PG#21 | 2.948     | 0.1474 | 2.256   | 0.1128 | 1.348  | 0.0674 | 1.542  | 0.0771 |
| PG#22 | 1.144     | 0.0572 | 1.19    | 0.0595 | 1.226  | 0.0613 | 1.18   | 0.059  |
| PG#23 | 1.042     | 0.0521 | 1.188   | 0.0594 | 0.982  | 0.0491 | 1.01   | 0.0505 |
| PG#24 | 1.084     | 0.0542 | 1.252   | 0.0626 | 0.858  | 0.0429 | 0.936  | 0.0468 |
| PG#25 | 0.826     | 0.0413 | 0.952   | 0.0476 | 0.858  | 0.0429 | 0.92   | 0.046  |
| PG#26 | 1.806     | 0.0903 | 0.626   | 0.0313 | 0.214  | 0.0107 | 0.47   | 0.0235 |
| PG#27 | 0.016     | 0.001  | 0.028   | 0.0014 | 1.384  | 0.0692 | 1.072  | 0.0536 |
| PG#28 | 0.696     | 0.0348 | 0.42    | 0.021  | 0.53   | 0.0265 | 0.742  | 0.0371 |
| PG#29 | 0.634     | 0.0317 | 0.592   | 0.0296 | 0.486  | 0.0243 | 0.44   | 0.022  |
| PG#30 | 0.392     | 0.0196 | 0.554   | 0.0277 | 0.514  | 0.0257 | 0.6    | 0.03   |
| PG#31 | 0.33      | 0.0165 | 0.51    | 0.0255 | 0.476  | 0.0238 | 0.51   | 0.0255 |
| PG#32 | 0.63      | 0.0315 | 0.392   | 0.0196 | 0.266  | 0.0133 | 0.488  | 0.0244 |
| PG#33 | 0.104     | 0.0052 | 0.03    | 0.0015 | 0.41   | 0.0205 | 0.38   | 0.019  |
| PG#34 | 0.28      | 0.014  | 0.18    | 0.009  | 0.156  | 0.0078 | 0.172  | 0.0086 |
| PG#35 | 0.102     | 0.0051 | 0.126   | 0.0063 | 0.156  | 0.0078 | 0.192  | 0.0096 |
| PG#36 | 0.308     | 0.0154 | 0.102   | 0.0051 | 0.084  | 0.0042 | 0.062  | 0.0031 |
| PG#37 | 0.184     | 0.0092 | 0.122   | 0.0061 | 0.092  | 0.0046 | 0.12   | 0.006  |
| PG#38 | 0.064     | 0.0032 | 0.016   | 0.001  | 0.15   | 0.0075 | 0.184  | 0.0092 |
| PG#39 | 0.028     | 0.0014 | 0.012   | 0.001  | 0.098  | 0.0049 | 0.096  | 0.0048 |
| PG#40 | 0.008     | 0.001  | 0       | 0      | 0.07   | 0.0035 | 0.038  | 0.0019 |
